# Supplementary material for: Multi-Polygenic prediction of Frailty and its Trajectories highlights Chronic Pain, Rheumatoid Arthritis, and Educational Attainment pathways
Source: PubMed Central journal article supplement — medRxiv. 2025 Jul 21:2024.05.31.24308260. Originally published 2024 May 31. Preprint. [Version 2] doi: 10.1101/2024.05.31.24308260 (PMC11160845; doi:10.1101/2024.05.31.24308260), 2025-07-21
Supplement: media-1.pdf [file media-1.pdf]

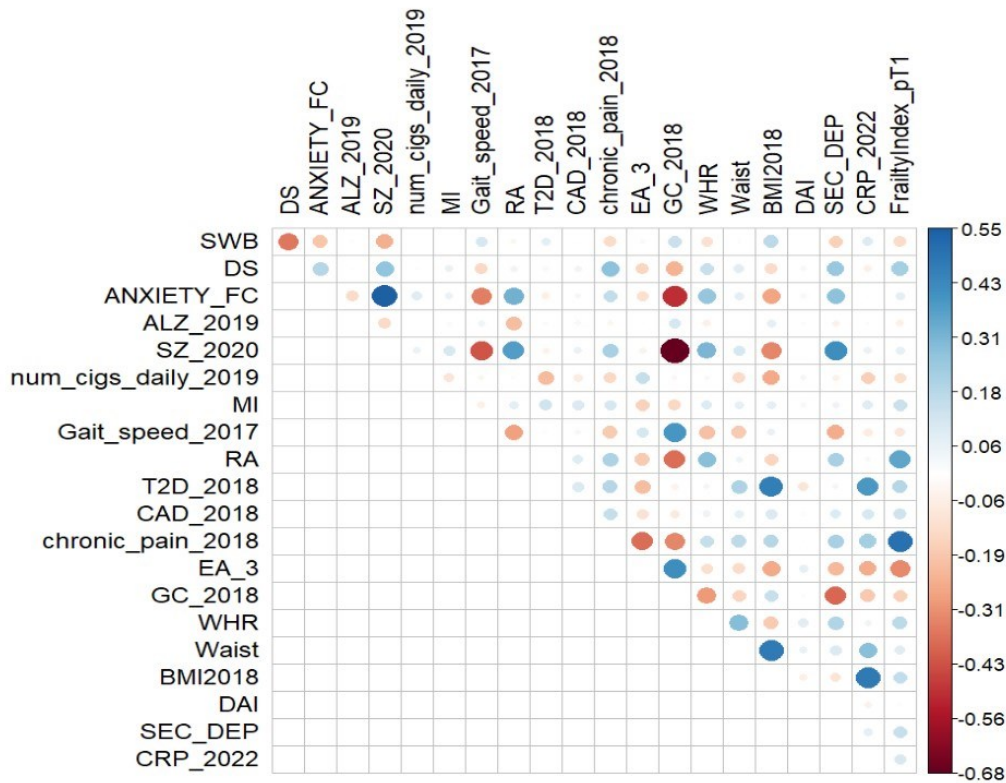

Supplementary Figure S1. ELSA correlation matrix for 26 PGS

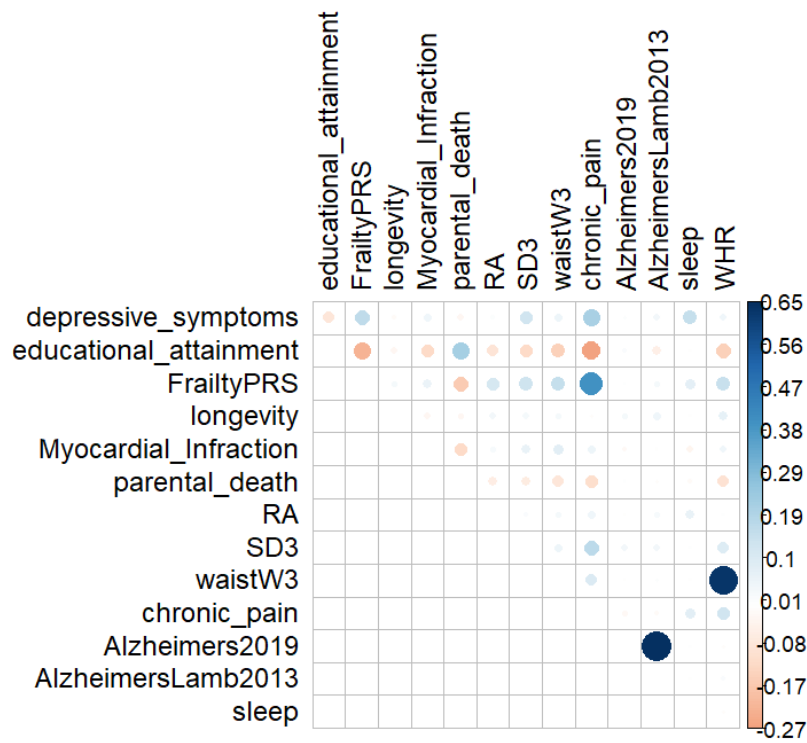

Supplementary Figure S2. LBC1936 (full sample – Wave 1) Correlation Matrix for predictive PGS

**Supplementary Table ST1: Elements comprising the frailty index in LBC1936**

| <b>Items</b>                    | <b>Coding</b>                                                                                                         | <b>Cut offs based on</b>                                  |
|---------------------------------|-----------------------------------------------------------------------------------------------------------------------|-----------------------------------------------------------|
| Systolic Blood Pressure         | <5 <sup>th</sup> percentile (1), 5 <sup>th</sup> -20 <sup>th</sup> percentile (0.5), >20 <sup>th</sup> percentile (0) | Recommended technique (Theou et al., 2015)                |
| Diabetes                        | Yes (1) or No (0)                                                                                                     | Already binary variable                                   |
| High Cholesterol                | Yes (1) or No (0)                                                                                                     | Already binary variable                                   |
| Heart problem                   | Yes (1) or No (0)                                                                                                     | Already binary variable                                   |
| Stroke or mini stroke           | Yes (1) or No (0)                                                                                                     | Already binary variable                                   |
| Crampy pains in calves          | Yes (1) or No (0)                                                                                                     | Already binary variable                                   |
| Problems with blood circulation | Yes (1) or No (0)                                                                                                     | Already binary variable                                   |
| Thyroid Disorder                | Yes (1) or No (0)                                                                                                     | Already binary variable                                   |
| Cancer                          | Yes (1) or No (0)                                                                                                     | Already binary variable                                   |
| Parkinson's disease             | Yes (1) or No (0)                                                                                                     | Already binary variable                                   |
| Dementia                        | Yes (1) or No (0)                                                                                                     | Already binary variable                                   |
| Arthritis                       | Yes (1) or No (0)                                                                                                     | Already binary variable                                   |
| Any other chronic disease       | Yes (1) or No (0)                                                                                                     | Already binary variable                                   |
| Polypharmacy                    | >4 medications (1), ≤4 medications (0)                                                                                | Recommended technique (Theou et al., 2013)                |
| Body Mass Index                 | 18.5 to <25 (0), 25 to <30 (0.5), <18.5 or ≥equal to 30 (1)                                                           | Recommended technique (Chamberlain, Sauver, et al., 2016) |
| 6m walk time (gait speed)       | >10 seconds or physically unable (1), <10 seconds (0)                                                                 | Recommended technique (Hoogendijk et al., 2017)           |
| Able to stand up from a chair   | Yes (1) or No (0)                                                                                                     | Already binary variable                                   |

| <b>Items</b>                                                 | <b>Coding</b>                                                                                                         | <b>Cut offs based on</b>                                   |
|--------------------------------------------------------------|-----------------------------------------------------------------------------------------------------------------------|------------------------------------------------------------|
| Grip strength (strongest hand and stratified by sex and BMI) | <5 <sup>th</sup> percentile (1), 5 <sup>th</sup> -20 <sup>th</sup> percentile (0.5), >20 <sup>th</sup> percentile (0) | Recommended technique (Theou et al., 2015)                 |
| Townsend Disability Scale                                    | 11 – 18 (1), 0 -10 (0)                                                                                                | Recommended technique (Fiona Elaine Matthews et al., 2016) |
| Peak Expiratory Flow rate (stratified by sex)                | <5 <sup>th</sup> percentile (1), 5 <sup>th</sup> -20 <sup>th</sup> percentile (0.5), >20 <sup>th</sup> percentile (0) | Recommended technique (Theou et al., 2015)                 |
| Forced expiratory volume (stratified by sex)                 | <5 <sup>th</sup> percentile (1), 5 <sup>th</sup> -20 <sup>th</sup> percentile (0.5), >20 <sup>th</sup> percentile (0) | Recommended technique (Theou et al., 2015)                 |
| Depression                                                   | 11 -21 (1), 8 – 10 (0.5), 0 – 7 (0)                                                                                   | Recommended technique (Zigmond & Snaith, 1983)             |
| Anxiety                                                      | 11 -21 (1), 8 – 10 (0.5), 0 – 7 (0)                                                                                   | Recommended technique (Zigmond & Snaith, 1983)             |
| MMSE                                                         | <10 (1), 11-17 (0.75), 18 – 20 (0.5), 20 – 24 (0.25), >24 (0)                                                         | Recommended technique (Searle et al., 2008)                |
| Digit Symbol                                                 | <5 <sup>th</sup> percentile (1), 5 <sup>th</sup> -20 <sup>th</sup> percentile (0.5), >20 <sup>th</sup> percentile (0) | Recommended technique (Theou et al., 2015)                 |
| Block Design                                                 | <5 <sup>th</sup> percentile (1), 5 <sup>th</sup> -20 <sup>th</sup> percentile (0.5), >20 <sup>th</sup> percentile (0) | Recommended technique (Theou et al., 2015)                 |
| Verbal Fluency                                               | <5 <sup>th</sup> percentile (1), 5 <sup>th</sup> -20 <sup>th</sup> percentile (0.5), >20 <sup>th</sup> percentile (0) | Recommended technique (Theou et al., 2015)                 |
| Matrix Reasoning                                             | <5 <sup>th</sup> percentile (1), 5 <sup>th</sup> -20 <sup>th</sup> percentile (0.5), >20 <sup>th</sup> percentile (0) | Recommended technique (Theou et al., 2015)                 |
| Reaction time test                                           | <5 <sup>th</sup> percentile (1), 5 <sup>th</sup> -20 <sup>th</sup> percentile (0.5), >20 <sup>th</sup> percentile (0) | Recommended technique (Theou et al., 2015)                 |
| Delayed recall                                               | <5 <sup>th</sup> percentile (1), 5 <sup>th</sup> -20 <sup>th</sup> percentile (0.5), >20 <sup>th</sup> percentile (0) | Recommended technique (Theou et al., 2015)                 |

**Supplementary Table ST2: Elements comprising the frailty index score and their seven domains in ELSA**

| <b>Variable name</b> | <b>Domain (taken from elsa questionnaire)</b> | <b>Description</b>                                                 |
|----------------------|-----------------------------------------------|--------------------------------------------------------------------|
| hemobwa              | mobility                                      | Difficulty walking 100m                                            |
| hemobsi              | mobility                                      | Difficulty sitting 2 hrs                                           |
| hemobch              | mobility                                      | difficulty getting up from chair after sitting long periods        |
| hemobcs              | mobility                                      | Difficulty climbing several flights of stairs without resting      |
| hemobcl              | mobility                                      | Difficulty climbing one flight of stairs without resting           |
| hemobst              | mobility                                      | Difficulty stooping, kneeling or crouching                         |
| hemobre              | mobility                                      | Difficulty reaching or extending arms above shoulder level         |
| hemobpu              | mobility                                      | Difficulty pulling or pushing large objects                        |
| hemobli              | mobility                                      | Difficulty lifting or carrying weights over 10 pounds (4.54kg)     |
| hemobpi              | mobility                                      | Difficulty picking up a 5p coin from a table                       |
| headldr              | activities of daily life                      | Difficulty dressing, including putting on shoes and socks          |
| headlwa              | activities of daily life                      | difficulty walking across a room                                   |
| headlba              | activities of daily life                      | Difficulty bathing or showering                                    |
| headlea              | activities of daily life                      | Difficulty eating, such as cutting up food                         |
| headlbe              | activities of daily life                      | Difficulty getting in and out of bed                               |
| headlwc              | activities of daily life                      | Difficulty using the toilet including getting up or down           |
| headlma              | activities of daily life                      | Difficulty using map to figure out how to get around strange place |
| headlpr              | activities of daily life                      | Difficulty preparing a hot meal                                    |
| headlsh              | activities of daily life                      | Difficulty shopping for groceries                                  |
| headlph              | activities of daily life                      | Difficulty making telephone calls                                  |
| headlme              | activities of daily life                      | Difficulty taking medications                                      |
| headlhg              | activities of daily life                      | Difficulty doing work around the house or garden                   |
| headlmo              | activities of daily life                      | Difficulty managing money, eg paying bills, keeping track of       |

|         |         |                                                                     |
|---------|---------|---------------------------------------------------------------------|
| hedimbp | CV      | expenses                                                            |
| hediman | CV      | High bp dx                                                          |
| hedimmi | CV      | Angina dx                                                           |
| hedimhf | CV      | Heart attack                                                        |
| hedimar | CV      | Congestive heart failure                                            |
| hedimdi | CV      | Abnormal heart rhythm                                               |
| hedimst | CV      | Diabetes or high blood sugar                                        |
| hediblu | Chronic | Stroke dx                                                           |
| hedibas | Chronic | Lung disease dx                                                     |
| hedibar | Chronic | Asthma dx                                                           |
| hedibos | Chronic | Arthritis dx                                                        |
| hedibca | Chronic | Osteoporosis                                                        |
| hedibpd | Chronic | Cancer dx                                                           |
| hedibps | Chronic | Parkinson's dx                                                      |
| hedibad | Chronic | Psychiatric condition                                               |
| hedibde | Chronic | Alzheimer's dx                                                      |
| psceda  | Psych   | Dementia dx                                                         |
| pscedb  | Psych   | Whether felt depressed much of the time during the past week        |
| pscedc  | Psych   | Whether felt everything they did during the past week was an effort |
| pscedd  | Psych   | Whether felt their sleep was restless during the past week          |
| pscede  | Psych   | Whether was happy much of the time during the past week /R          |
| pscedf  | Psych   | Whether felt lonely much of the time during the past week           |
| pscedg  | Psych   | Whether enjoyed life much of the time during the past week /R       |
| pscedh  | Psych   | Whether felt sad much of the time during the past week              |
| hehelp  | General | Whether could not get going much of the time during the past week   |
| heeye   | General | Self-reported general health                                        |
| hehear  | General | Self-reported eyesight (while using lenses if appropriate)          |
| hefla   | General | Self-reported hearing (while using hearing aid if appropriate)      |
|         |         | Whether fallen down since last interview                            |

|          |         |                                                                                  |
|----------|---------|----------------------------------------------------------------------------------|
| hefrac   | General | Whether has fractured hip                                                        |
| heji     | General | Whether had joint replacement                                                    |
| mmpain   | General | Timed walk: whether had pain whilst walking                                      |
| cfdatd   | Memory  | Whether correct day of month given                                               |
| cfdatm   | Memory  | Whether correct month given                                                      |
| cfdaty   | Memory  | Whether correct year given                                                       |
| cfday    | Memory  | Whether correct day given                                                        |
| cfmem    | Memory  | Whether prompt given for prospective memory test (remembering to write initials) |
| cflisenq | Memory  | Refers to cflisen                                                                |
| cfaniq   | Memory  | Refers to cfani                                                                  |
| cfliisdq | Memory  | Refers to cfliisd                                                                |
